# Supplementary material
Source: MDPI journal article supplement (https://www.mdpi.com/2073-4395/11/9/1750)
Supplement: s1 [file s1]

## Supplementary material

**Table S1.** Macronutrient and sodium concentrations in the plants used in the experiment (dry weight basis, average  $\pm$  se; n = 2).

| Plants               | N<br>(g kg <sup>-1</sup> ) | K<br>(g kg <sup>-1</sup> ) | P<br>(g kg <sup>-1</sup> ) | Ca<br>(g kg <sup>-1</sup> ) | Mg<br>(g kg <sup>-1</sup> ) | Na<br>(g kg <sup>-1</sup> ) |
|----------------------|----------------------------|----------------------------|----------------------------|-----------------------------|-----------------------------|-----------------------------|
| <i>D. viscosa</i>    | 5.7 $\pm$ 0.1 e            | 11.5 $\pm$ 0.4 c           | 1.0 $\pm$ 0.02 b           | 4.6 $\pm$ 0.1 d             | 3.1 $\pm$ 0.1 c             | 4.1 $\pm$ 0.1 c             |
| <i>A. halimus</i>    | 12.1 $\pm$ 0.0 b           | 27.1 $\pm$ 0.03 a          | 0.6 $\pm$ 0.01 d           | 3.3 $\pm$ 0.2 e             | 6.4 $\pm$ 0.1 a             | 10.2 $\pm$ 0.7 b            |
| <i>B. bituminosa</i> | 14.8 $\pm$ 0.1 ab          | 14.1 $\pm$ 0.4 b           | 1.0 $\pm$ 0.03 b           | 10.3 $\pm$ 0.3 b            | 3.2 $\pm$ 0.1 bc            | 0.3 $\pm$ 0.01 g            |
| <i>Z. fabago</i>     | 19.9 $\pm$ 0.8 a           | 9.6 $\pm$ 0.1 d            | 1.4 $\pm$ 0.02 a           | 26.8 $\pm$ 0.01 a           | 3.6 $\pm$ 0.05 b            | 18.1 $\pm$ 0.04 a           |
| <i>A. donax</i>      | 7.2 $\pm$ 0.2 cd           | 13.0 $\pm$ 0.2 b           | 0.7 $\pm$ 0.03 c           | 2.5 $\pm$ 0.1 f             | 1.2 $\pm$ 0.04 f            | 0.2 $\pm$ 0.01 h            |
| <i>P. australis</i>  | 5.9 $\pm$ 0.0 e            | 5.8 $\pm$ 0.06e            | 0.3 $\pm$ 0.01 e           | 1.6 $\pm$ 0.002 h           | 2.3 $\pm$ 0.01 d            | 0.6 $\pm$ 0.01 e            |
| <i>P. miliaceum</i>  | 6.6 $\pm$ 0.3 d            | 9.7 $\pm$ 0.1 d            | 0.7 $\pm$ .010 c           | 2.2 $\pm$ 0.0005g           | 1.2 $\pm$ 0.01 f            | 0.3 $\pm$ 0.003 f           |
| <i>F. vulgare</i>    | 7.7 $\pm$ 0.2 c            | 12.9 $\pm$ 0.2 b           | 0.6 $\pm$ 0.03 d           | 7.7 $\pm$ 0.1 c             | 1.8 $\pm$ 0.14 e            | 2.4 $\pm$ 0.12 d            |
| ANOVA                | ***                        | ***                        | ***                        | ***                         | ***                         | ***                         |

\*\*\*: significant at  $P < 0.001$ . Values followed by the same letter in each column do not differ significantly according to Tukey's test at  $P < 0.05$ .

**Table S2.** Pearson's coefficients for the correlations between the concentrations of the different TEs in the plants (n = 8).

|           | <b>Al</b> | <b>As</b> | <b>Cd</b> | <b>Cu</b> | <b>Fe</b> | <b>Mn</b> |
|-----------|-----------|-----------|-----------|-----------|-----------|-----------|
| <b>Cd</b> | 0.887**   | 0.728*    |           |           |           |           |
| <b>Cu</b> | 0.796*    | 0.588     | 0.818*    |           |           |           |
| <b>Fe</b> | 0.885**   | 0.887**   | 0.890**   | 0.672     |           |           |
| <b>Pb</b> | 0.883**   | 0.795*    | 0.885**   | 0.799*    | 0.934***  | 0.339     |
| <b>Zn</b> | 0.467     | 0.413     | 0.707*    | 0.852**   | 0.403     | 0.934***  |

\*, \*\* and \*\*\*: significant at  $P < 0.05$ , 0.01 and 0.001, respectively.
